# Supplementary material for: SNP‐based genotyping and whole‐genome sequencing reveal previously unknown genetic diversity in Xanthomonas vasicola pv. musacearum, causal agent of banana xanthomonas wilt, in its presumed Ethiopian origin
Source: PubMed Central journal article supplement (PMC7984043; doi:10.1111/ppa.13308), 2020-11-27

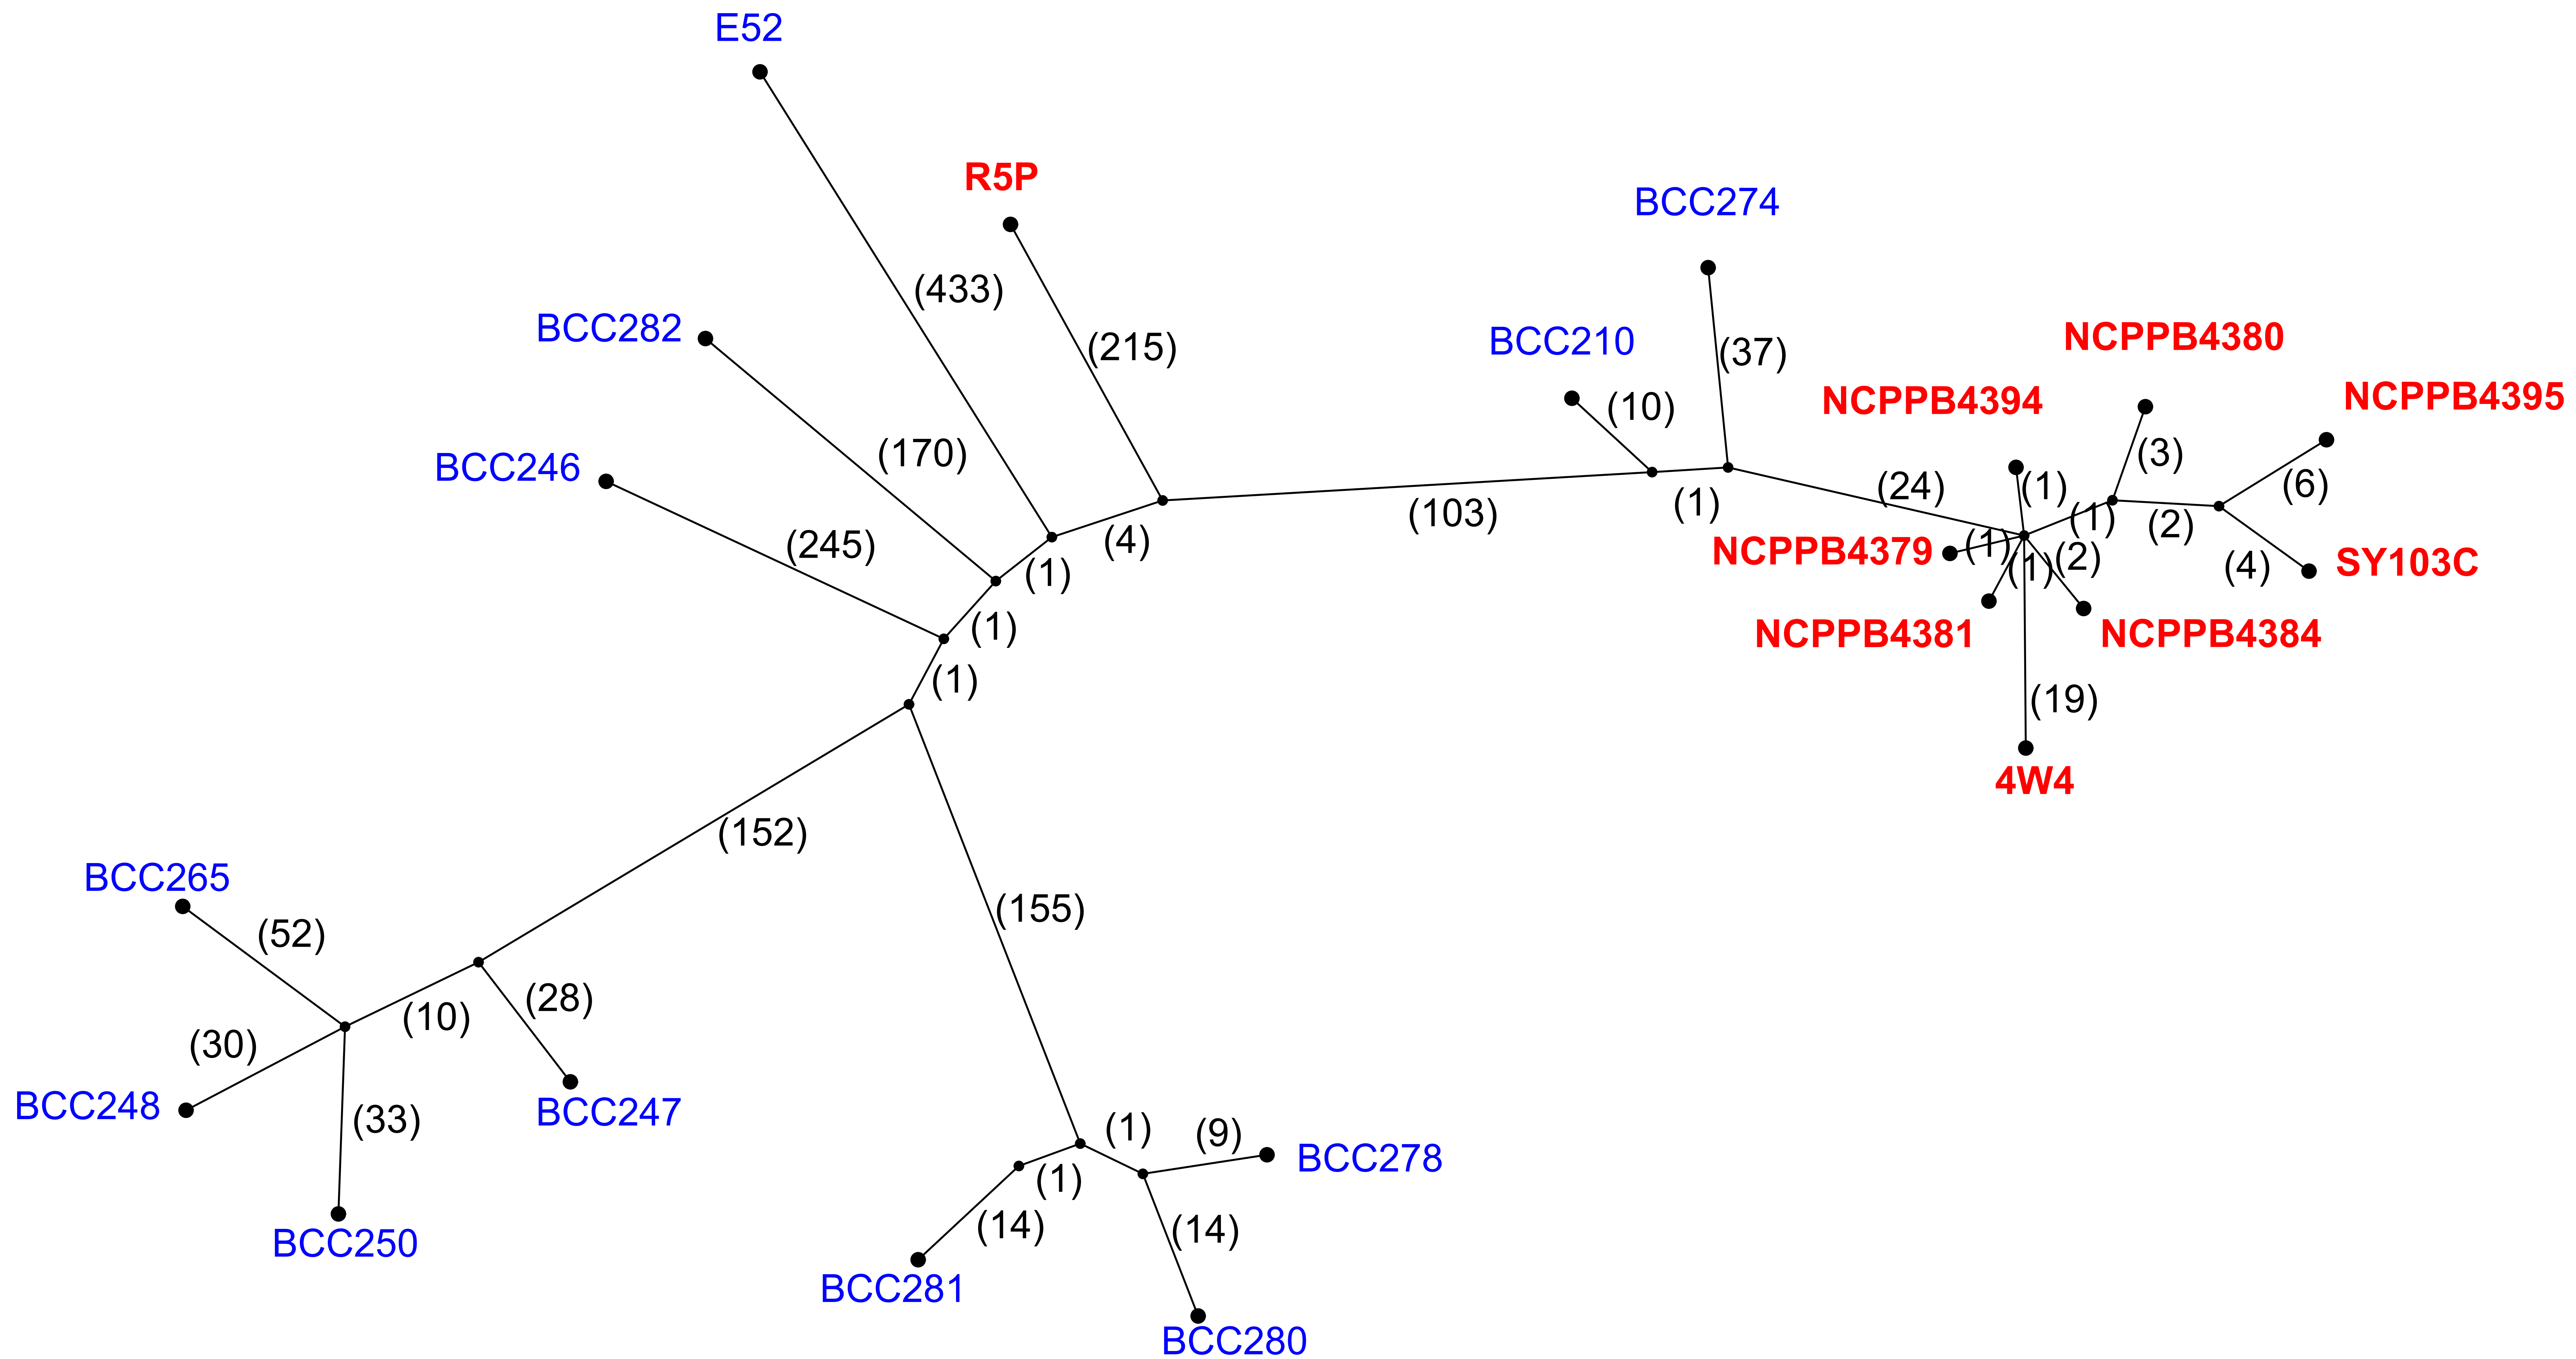

Supplement: PPA-70-534-s002.pdf [file PPA-70-534-s002.pdf]
